# Supplementary material for: Computational study of the copolymerization mechanism of ethylene with methyl 2-acetamidoacrylate catalyzed by phosphine-sulfonate palladium complexes
Source: Royal Society of Chemistry journal article supplement (doi:10.1039/d1nj02698d), 2021-01-01
Supplement: d1nj02698d1.pdf [file d1nj02698d1.pdf]

## Supporting Information

### Computational study of copolymerization mechanism of ethylene with methyl 2-acetamidoacrylate catalyzed by phosphine-sulfonate palladium complexes

Andleeb Mehmood,<sup>a</sup> Xiaowei Xu,<sup>a</sup> Waseem Raza<sup>a</sup>, Deepak Kukkar<sup>b</sup>, Ki-Hyun Kim<sup>b,\*</sup>, and Yi Luo<sup>\*a,c</sup>

<sup>a</sup>State Key Laboratory of Fine Chemicals, School of Chemical Engineering, Dalian University of Technology, Dalian 116024, China

<sup>b</sup>Department of Civil and Environmental Engineering, Hanyang University, 222 Wangsimni-Ro, Seoul Korea E-mail: kkim61@hanyang.ac.kr

<sup>c</sup>PetroChina Petrochemical Research Institute, Beijing 102206, China E-mail: luoyi@dlut.edu.cn

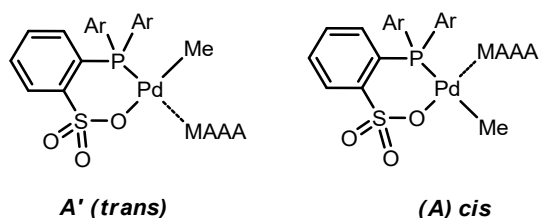

**Fig. S1.** Two coordinated manners (*Trans* (**A'**) and *cis* (**A**), Ar = 2-MeOC<sub>6</sub>H<sub>4</sub>) of the MAAA corresponding to P-atom of phosphine-sulfonate based Pd complexes.

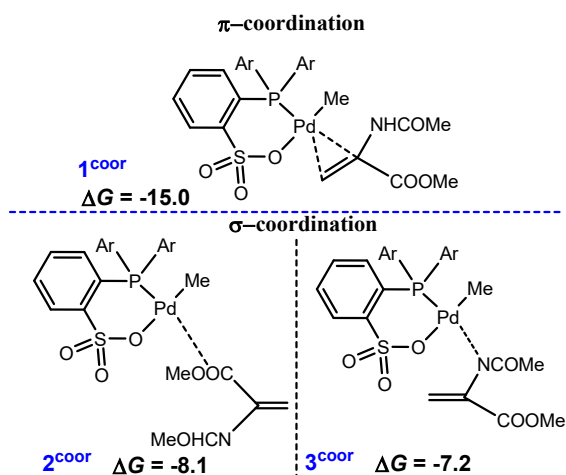

**Fig. S2.** Two coordination sites for polar monomers with phosphine-sulfonate based Pd complexes.

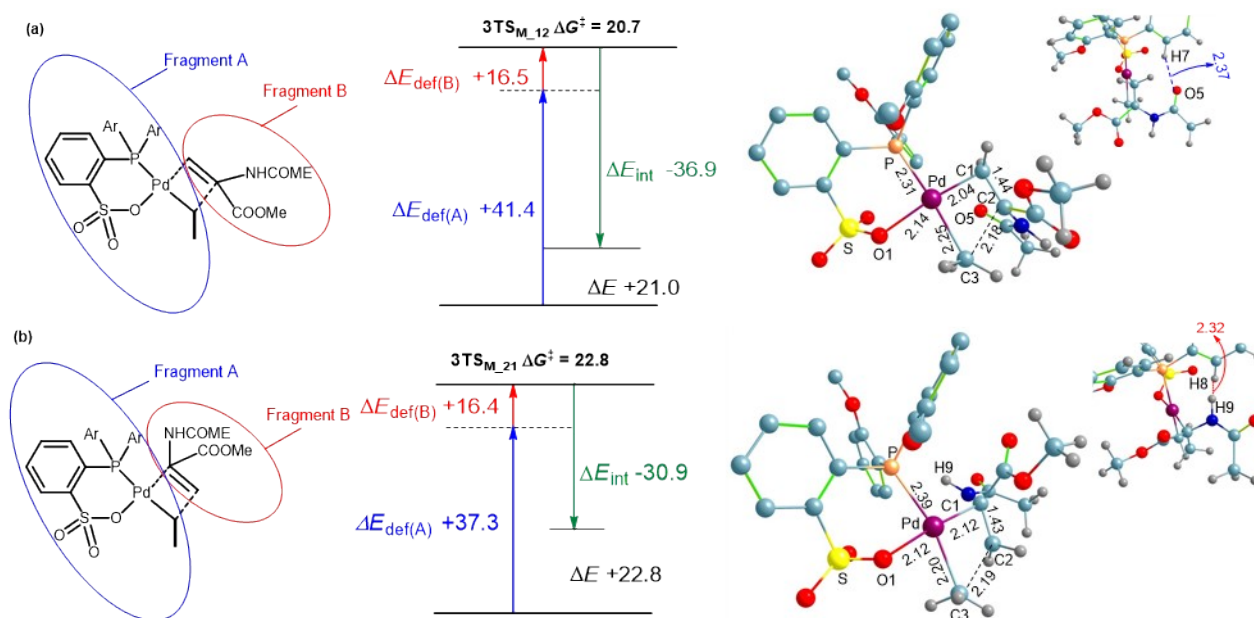

**Fig. S3.** Detailed distortion/interaction analysis of the transition state: (a)  $3\text{TS}_{\text{M}_12\text{M}}$  and (b)  $3\text{TS}_{\text{AM}_21\text{M}}$ . Energy in  $\text{kcal mol}^{-1}$  and distances in Å. Hydrogen atoms of the catalyst's ligand have been omitted for clarity.

**Table. S1.** Computed energies for ethylene (E) and polar monomer (MAAA) copolymerization catalyzed by  $\text{L}_2$  with substituent effect ( $\text{R} = \text{H}$  and  $\text{OMe}$ ) complex.  $^{\text{E-MAAA}}\text{C}_1$  and  $^{\text{E-MAAA}}\text{TS}_1$  are polar monomer MAAA coordination complexes and transition states, respectively.  $^{\text{E-MAAA-E}}\text{C}_2$  and  $^{\text{E-MAAA-E}}\text{TS}_1$  are coordination complexes and transition states of ethylene and MAAA copolymers, respectively.

| Catalyst $\text{L}_2$ | Insertion | E-MAAA       | E-MAAA        | E-MAAA                      | E-MAAA-E     | E-MAAA-E      | E-MAAA-E                    |
|-----------------------|-----------|--------------|---------------|-----------------------------|--------------|---------------|-----------------------------|
|                       |           | $\text{C}_1$ | $\text{TS}_1$ | $\Delta\text{G}_1^\ddagger$ | $\text{C}_2$ | $\text{TS}_2$ | $\Delta\text{G}_2^\ddagger$ |
| $\text{L}_2$ ,        | 1,2       | -21.5        | 2.0           | 23.5                        | -31.2        | -8.0          | 23.2                        |
| <b>R= H</b>           | 2,1       | -22.9        | -2.7          | 20.1                        | -35.7        | -14.1         | 21.6                        |
| $\text{L}_2$ ,        | 1,2       | -27.9        | -4.2          | 23.8                        | -41.4        | -18.5         | 23.0                        |
| <b>R= OMe</b>         | 2,1       | -22.2        | -3.1          | 19.1                        | -42.1        | -25.0         | 17.0                        |

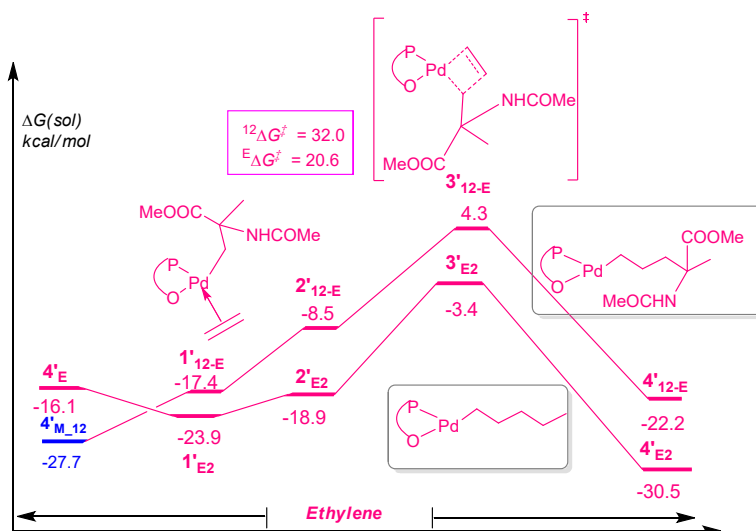

**Fig. S4.** Chain propagation via ethylene insertion in 1,2-MAAA enchainment and ethylene enchainment species by applying catalyst A.

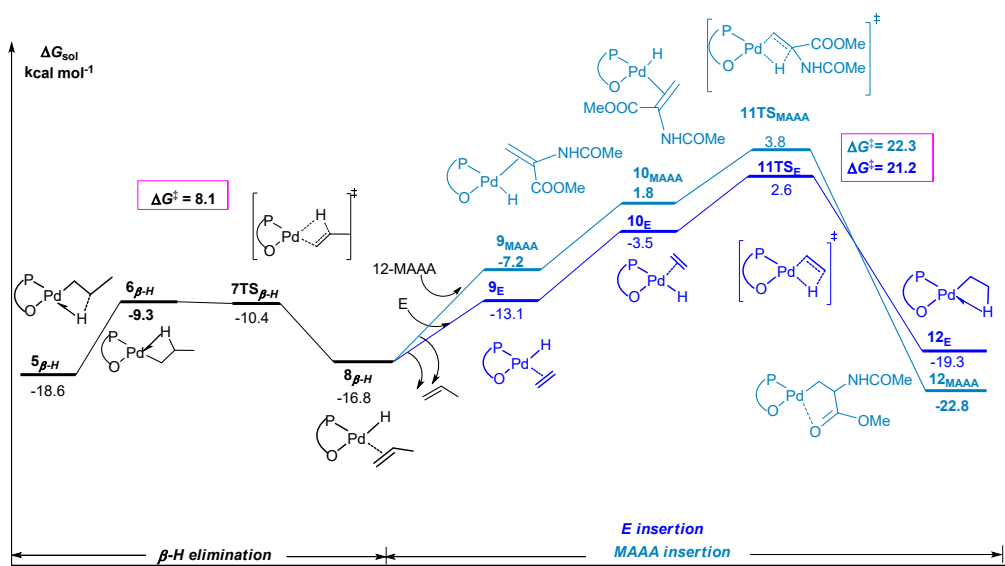

**Fig. S5.** Energy profiles for  $\beta$ -H elimination and chain re-growth by using catalyst A.

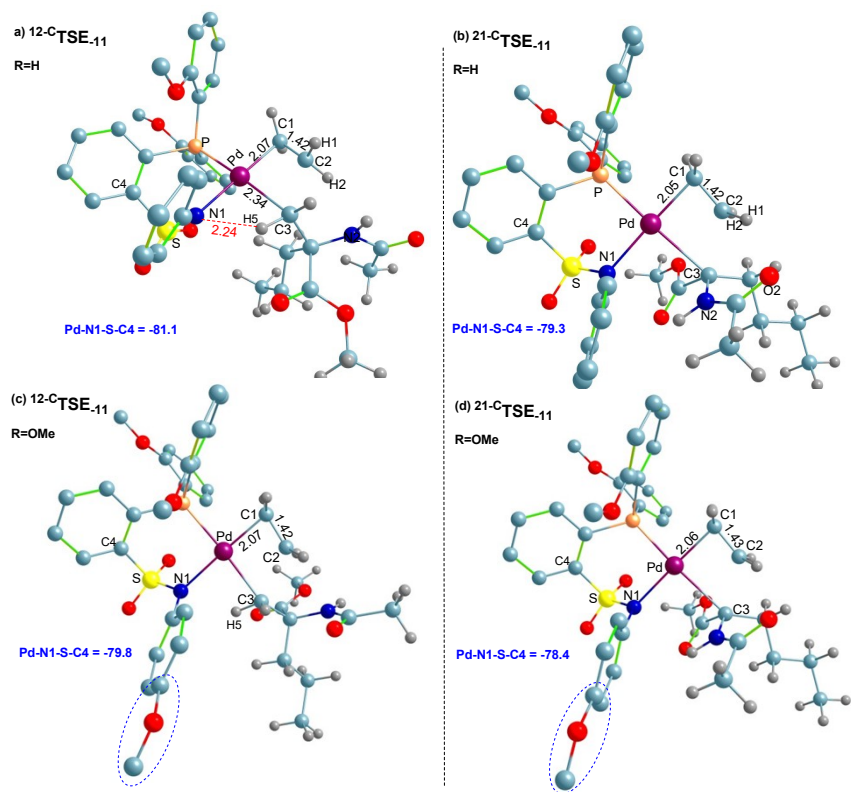

**Fig. S6.** Geometrical analysis of transition states to compare the substituent effect (R= H and OMe) of catalyst C.
